# Supplementary material
Source: PubMed Central journal article supplement (PMC3179094)
Supplement: 1112960108_pnas.201112960SI.pdf [file 1112960108_pnas.201112960SI.pdf]

# Supporting Information

Spradling et al. 10.1073/pnas.1112960108

**Table S1. P element hotspots have a normal consensus sequence**

| Gene             | Site         | N (+,-)                  | Sequence |
|------------------|--------------|--------------------------|----------|
| <i>Rapgap1</i>   | 2L:7576630   | 66,30                    | GTCTGGCC |
| <i>cpo</i>       | 3R:13769792  | 61,24                    | GTTCAGGC |
| <i>CG14709</i>   | 3R:7394886   | 28,7                     | ACCTGGCA |
| <i>Hsromega</i>  | 3R:17122251  | 11,4                     | CTCCAACC |
| <i>Hsromega</i>  | 3R: 17122251 | 11,4                     | CTCCAACC |
| <i>Men</i>       | 3R:8545692   | 5,19                     | GCCGCGAC |
| <i>emc</i>       | 3L: 749335   | 29,10                    | ACTCCGCC |
| <i>emc</i>       | 3L:749314    | 7,3                      | CTCCAGCC |
| <i>CG32529</i>   | X:19781153   | 6,13                     | GCCCAAAC |
| <i>fw</i>        | X:11898003   | 11,8                     | GTCTGCAC |
| <i>apt</i>       | 2R:19468319  | 11,4                     | AATCAGCC |
| <i>CG11033</i>   | 3R:4878202   | 10,7                     | GTGTGGC  |
| <i>No gene</i>   | 3R:4076136   | 5,13                     | GTTTGGCG |
| <i>kis</i>       | 2L: 249358   | 5,3                      | GTCCAAGC |
| <i>CG17646</i>   | 2L: 1737432  | 9,0                      | GTCTTATA |
| <i>CG2201</i>    | 2L: 21618795 | 7,32                     | ACCCAGAC |
| <i>sra</i>       | 3R: 12015331 | 6,18                     | GGCTATAC |
| <i>l(2)01289</i> | 2R: 2628194  | 17,26                    | CTCGGTGC |
| <i>heph</i>      | 3R: 27811472 | 4,23                     | CGCTGGAT |
| <i>mir-282</i>   | 3L: 3250542  | 12,13                    | GCACAAAC |
| <i>wech</i>      | 2R: 337745   | 15,9                     | GTTCAGGG |
| <i>Gli</i>       | 2L: 15762777 | 14,13                    | CCCAAACG |
| <i>Myo31D</i>    | 2L: 10506779 | 6,8                      | GGTCAGAC |
| <i>CG3624</i>    | 2R: 18289592 | 7,15                     | GGTTGGAT |
| <i>Tm1</i>       | 3R: 11117373 | 12,3                     | GTCCAGCG |
| <i>PQBP-1</i>    | 3R: 4303341  | 2,14                     | CTTGGAAC |
| <i>RhoL</i>      | 3R: 5328296  | 4,9                      | AACTGAAC |
| <i>No gene</i>   | 2L: 7423926  | 6,8                      | GTCTGGGC |
| <i>Thor</i>      | 2L: 3478324  | 4,13                     | AGCCGACC |
| Consensus        |              | G(T/G/C)CYPuPu (A/G/C) C |          |

Sites with at least eight *P* element insertions into the same nucleotide ("hotspots") are listed by gene and sequence coordinate. The number of insertions in the + and - orientation [N (+,-)] are given along with the eight-base pair duplication associated with the insertions. An imperfect consensus is shown that agrees closely with a similar consensus for all *P* target sites (1).

1. Liao GC, Rehm EJ, Rubin GM (2000) Insertion site preferences of the *P* transposable element in *Drosophila melanogaster*. *Proc Natl Acad Sci USA* 97:3347–3351.



Table S2. Cont.

| N   | Gene            | P hits | ORC site(s)                       | P  | enr   | Pig | enr | Mi | enr |
|-----|-----------------|--------|-----------------------------------|----|-------|-----|-----|----|-----|
| 64  | <i>Lk6</i>      | 32     | 3119_Kc, 2658_S2, <b>2892_BG</b>  | 16 | 274   | 0   | 0   | 0  | 0   |
| 65  | <i>CG17646</i>  | 32     | <b>76_BG3</b>                     | 26 | 861   | 0   | 0   | 1  | 59  |
| 66  | <i>ttk</i>      | 31     | <b>3653_BG</b> , 3420_S2, 3932_Kc | 14 | 233   | 0   | 0   | 0  | 0   |
| 67  | <i>oaf</i>      | 31     | 107_BG, 124_Kc, <b>110_S2</b>     | 8  | 395   | 0   | 0   | 0  | 0   |
| 68  | <i>CG11367</i>  | 31     | 2738_Kc, 2560_BG, <b>2339_S2</b>  | 24 | 1,360 | 0   | 0   | 0  | 0   |
| 69  | <i>exba</i>     | 31     | 2668_BG, <b>2860_Kc</b> , 2429_S2 | 17 | 317   | 1   | 28  | 0  | 0   |
| 70  | <i>CG30015</i>  | 31     | <b>956_S2</b> , 1138_Kc, 1032_BG  | 24 | 629   | 0   | 0   | 0  | 0   |
| 71  | <i>PQBP-1</i>   | 31     | <b>2967_Kc</b>                    | 28 | 705   | 0   | 0   | 0  | 0   |
| 72  | <i>Eip75B</i>   | 29     | <b>2535_Kc</b> , 2208_S2, 2372_BG | 16 | 144   | 0   | 0   | 0  | 0   |
| 73  | <i>stwl</i>     | 29     | 2206_BG, 2385_Kc, <b>2063_S2</b>  | 26 | 298   | 0   | 0   | 0  | 0   |
| 74  | <i>inx2</i>     | 29     | <b>3975_BG</b> , 4377_Kc, 3702_S2 | 23 | 459   | 0   | 0   | 0  | 0   |
| 75  | <i>Mocs1</i>    | 29     | 2267_Kc, 1962_S2, <b>2101_BG</b>  | 27 | 1,290 | 0   | 0   | 0  | 0   |
| 76  | <i>CG9674</i>   | 29     | <b>2317_BG</b> , 2472_Kc, 2152_S2 | 4  | 59    | 0   | 0   | 0  | 0   |
| 77  | <i>shep</i>     | 29     | 2051_Kc, <b>1747_S2</b> , 1903_BG | 8  | 184   | 0   | 0   | 0  | 0   |
| 78  | <i>rdx</i>      | 29     | 3183_Kc, <b>2955_BG</b> , 2724_S2 | 8  | 245   | 0   | 0   | 0  | 0   |
| 79  | <i>tlk</i>      | 29     | <b>3594_S2</b> , 4212_Kc, 3851_BG | 6  | 98    | 0   | 0   | 0  | 0   |
| 80  | <i>melt</i>     | 28     |                                   | 0  | 0     | 0   | 0   | 0  | 0   |
| 81  | <i>CG3036</i>   | 28     | 173_S2, 202_Kc, <b>179_BG</b>     | 26 | 780   | 0   | 0   | 0  | 0   |
| 82  | <i>EcR</i>      | 27     | 801_BG, 777_S2, <b>897_Kc</b>     | 14 | 304   | 0   | 0   | 0  | 0   |
| 83  | <i>eff</i>      | 27     | 3216_Kc, 2997_BG, <b>2766_S2</b>  | 20 | 522   | 0   | 0   | 0  | 0   |
| 84  | <i>B4</i>       | 27     | <b>496_BG</b> , 543_Kc, 486_S2    | 11 | 84    | 0   | 0   | 0  | 0   |
| 85  | <i>tou</i>      | 27     | <b>1069_BG</b> , 996_S2, 1173_Kc  | 7  | 119   | 0   | 0   | 0  | 0   |
| 86  | <i>CG2185</i>   | 27     | 2675_BG, 2866_Kc, <b>2435_S2</b>  | 26 | 831   | 0   | 0   | 0  | 0   |
| 87  | <i>tai</i>      | 27     | 349_S2, <b>384_Kc</b> , 350_S2    | 15 | 389   | 0   | 0   | 0  | 0   |
| 88  | <i>mbl</i>      | 27     | 1313_BG3, 1234_S2                 | 0  | 0     | 0   | 0   | 0  | 0   |
| 89  | <i>TyrR</i>     | 26     |                                   | 0  | 0     | 0   | 0   | 0  | 0   |
| 90  | <i>brat</i>     | 26     | 721_Kc, <b>632_S2</b> , 659_BG    | 14 | 81    | 0   | 0   | 0  | 0   |
| 91  | <i>sgl</i>      | 26     | 1794_S2, <b>2099_Kc</b> , 1950_BG | 24 | 249   | 0   | 0   | 0  | 0   |
| 92  | <i>Trl</i>      | 26     | <b>2224_BG</b> , 2073_S2          | 9  | 115   | 0   | 0   | 0  | 0   |
| 93  | <i>wun2</i>     | 26     | 1057_Kc, <b>886_S2</b> , 942_BG   | 14 | 864   | 0   | 0   | 0  | 0   |
| 94  | <i>dpr</i>      | 26     |                                   | 0  | 0     | 0   | 0   | 0  | 0   |
| 95  | <i>trbl</i>     | 26     | 2489_BG, <b>2284_S2</b> , 2649_Kc | 17 | 624   | 0   | 0   | 0  | 0   |
| 96  | <i>elav</i>     | 26     | 4030_Kc, 3716_BG, <b>4031_Kc</b>  | 3  | 350   | 0   | 0   | 0  | 0   |
| 97  | <i>Pfrx</i>     | 26     | <b>5051_Kc</b> , 4155_S2          | 20 | 306   | 0   | 0   | 0  | 0   |
| 98  | <i>chic</i>     | 25     | <b>236_Kc</b> , 209_S2, 220_BG    | 23 | 127   | 0   | 0   | 0  | 0   |
| 99  | <i>Myo31D-f</i> | 25     | 441_Kc, 399_S2, <b>408_BG</b>     | 25 | 578   | 0   | 0   | 0  | 0   |
| 100 | <i>Df31</i>     | 25     | 728_S2, <b>753_BG</b> , 831_Kc    | 11 | 447   | 0   | 0   | 0  | 0   |

The 100 top *P* element hotspots are listed along with the number of *P* element insertions observed (*P* hits). One or more sites of ORC-binding (1) are listed if they overlap genic insertions. The number of *P* element (*P*), *piggyBac* (*Pig*), and *Minos* element (*Mi*) insertions within the specific ORC site shown in boldface, and the corresponding enrichment values (*enr*) are listed.

1. Eaton ML, et al. (2011) Chromatin signatures of the *Drosophila* replication program. *Genome Res* 21:164–174.
